# Supplementary material
Source: Springer Nature journal article supplement (https://www.springermedizin.de/resource/supplementary/13031_2011_86_MOESM1_ESM.pdf/9645070)

## Children Under Five Admitted to Feeding Programs, 2007-2009\* (Annual Average)

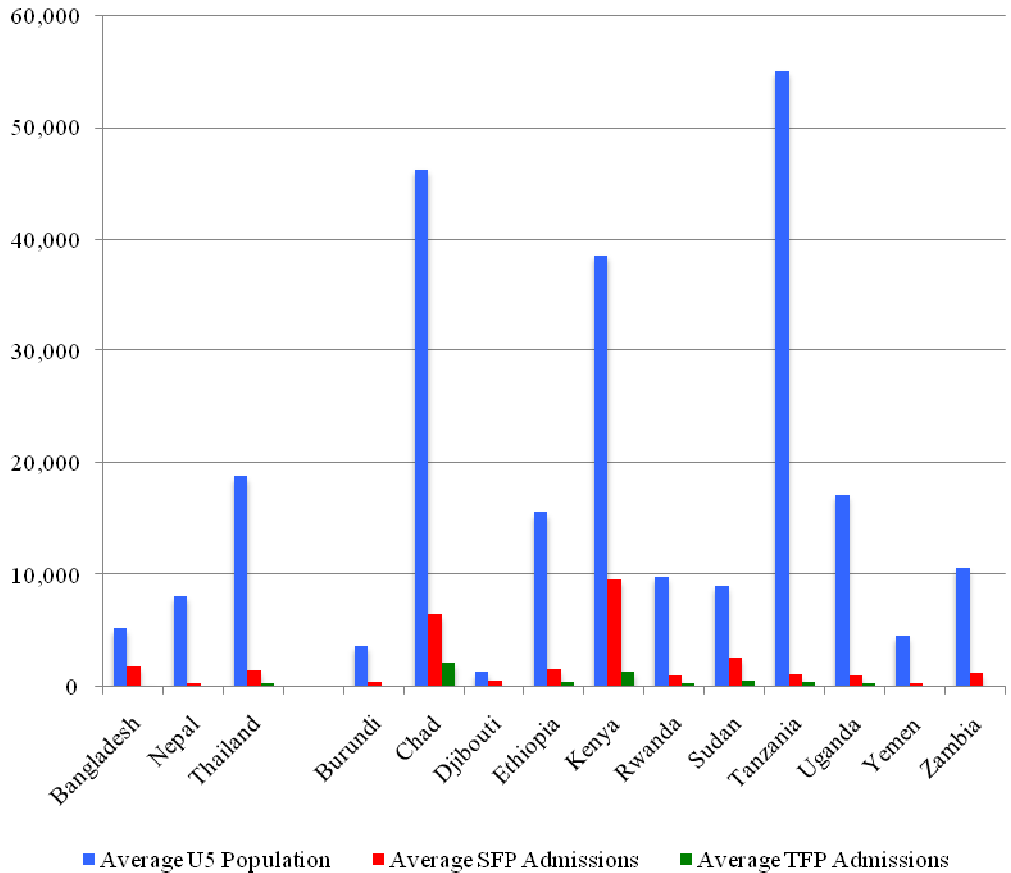

Supplement: MOESM1 [file 9645070]
